# Supplementary material for: Phenotypic Selection of Dairy Cattle Infected with Bovine Leukemia Virus Demonstrates Immunogenetic Resilience through NGS-Based Genotyping of BoLA MHC Class II Genes
Source: MDPI journal article supplement (doi:10.3390/pathogens11010104), 2022-01-15
Supplement: s1 [file s1]

## SUPPLEMENTAL

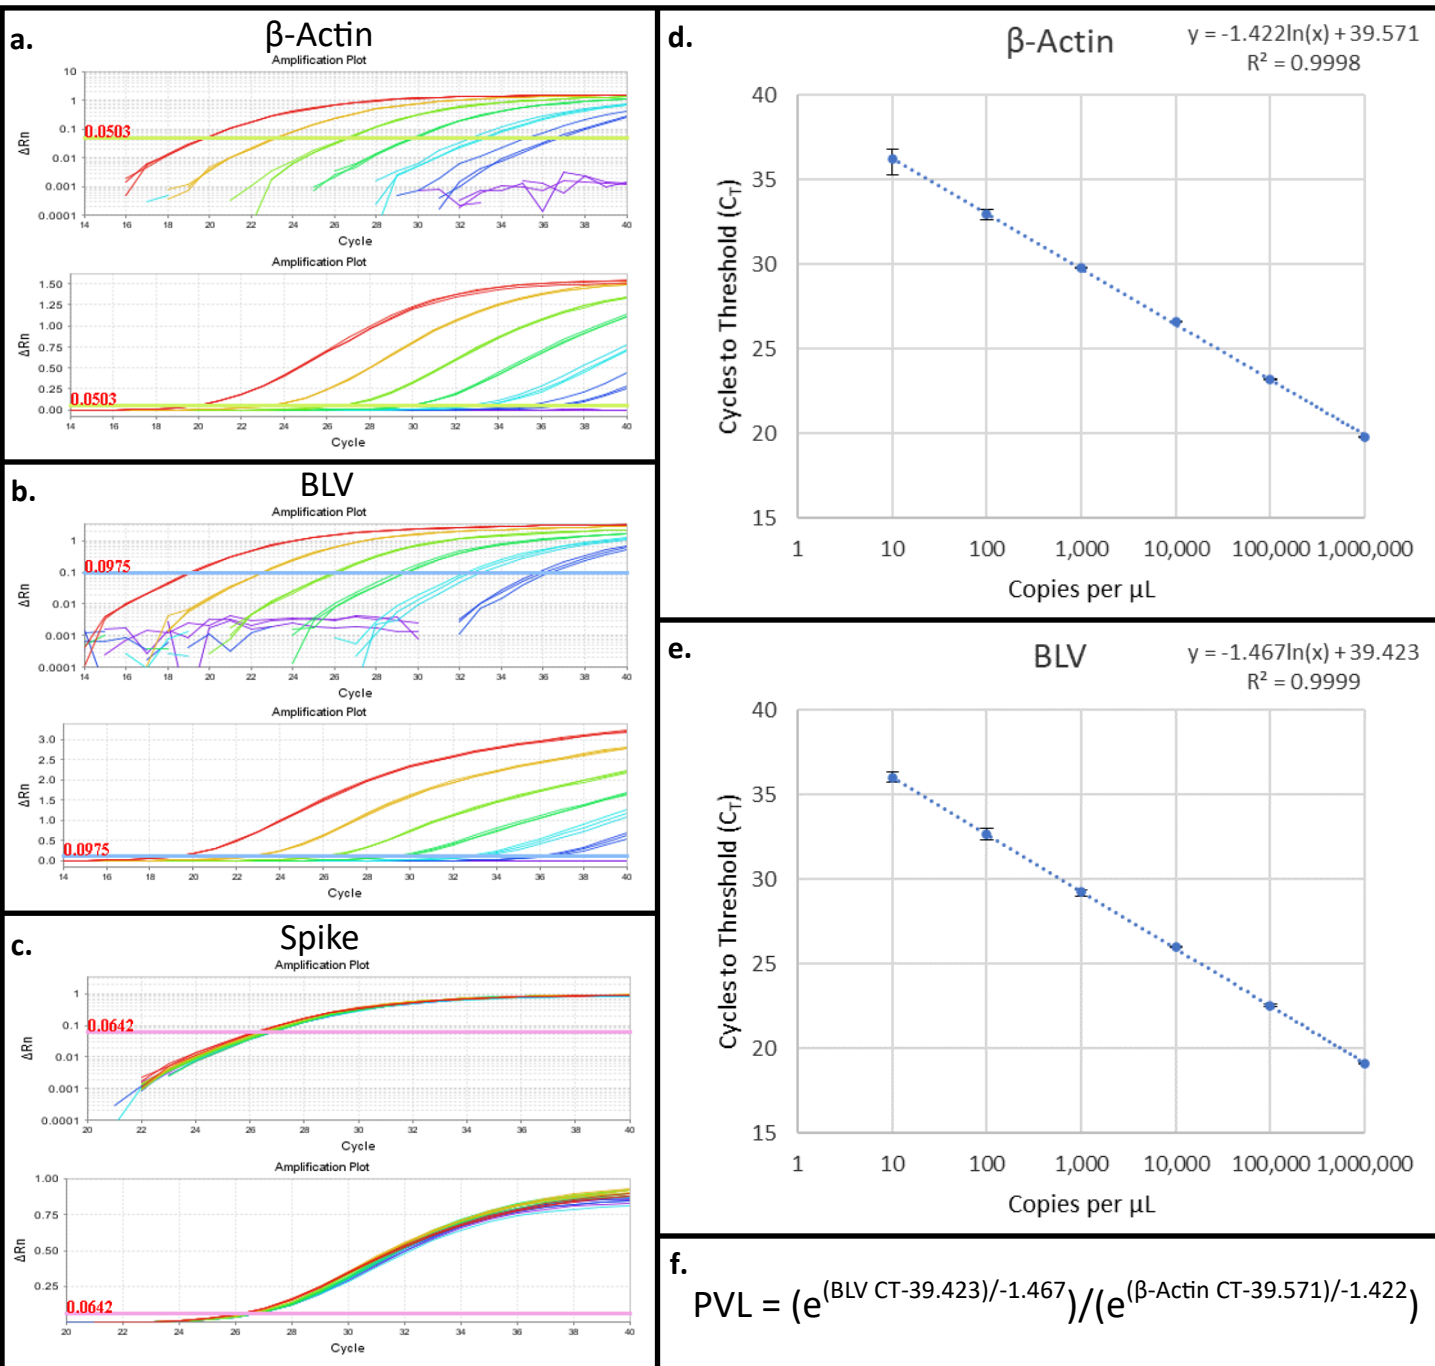

**Figure S1:** Calibration of the SS1 BLV proviral load assay. DNA standards were produced through traditional molecular cloning techniques where PCR target templates were cloned into the pUC57 DNA Vector, linearized via *ScaI* restriction enzyme and subsequently quantified via serial dilution and ddPCR. Original aliquots were normalized to  $1 \times 10^6$  copies/ $\mu$ L with Tris-EDTA pH 8.0 and 5 ng/ $\mu$ L of polyA carrier RNA (Thermo Fisher) prior to PCR calibration. 4x20  $\mu$ L aliquots of this stock were prepared for both  $\beta$ -Actin and BLV. Microcentrifuge tubes for each target were labeled with dilution ( $10^5$ ,  $10^4$ ,  $10^3$ ,  $10^2$ ,  $10^1$ ) and loaded with 45  $\mu$ L TE. Serial dilutions were performed by adding 5  $\mu$ L of previous dilution, vortexing and spinning down between each. The DNA standards were subjected to SS1 PCR in triplicate; analysis thresholds were set at 3% of amplification curve plateau for both  $\beta$ -Actin (a) and BLV (b), and at 7% for Spike (c). Average CT results for  $\beta$ -Actin (d) and BLV (e) were graphed in scatter plots to generate a line of regression for each, relating CT to copies of target sequence per 1  $\mu$ L. These regression equations were used to generate the formula (f) used to calculate proviral load (PVL), the relative concentration of BLV proviral DNA to bovine DNA amplified in the sample.

**Table S1:** BoLA-DRB3 Plasmid control sequencing results. Plasmids containing specific DRB3 alleles were used as PCR templates for producing barcoded DRB3 amplicons and sequenced alone and in combination with PCR amplicons from animal gDNA templates. None of the gDNA-derived amplicons from animals were included in this study.

| Well | Well Input      | DRB3 Control Name | TruSeq ID          | Control Primary Allele |          |             | Control Secondary Allele |          |             | Plasmid Final Call  |
|------|-----------------|-------------------|--------------------|------------------------|----------|-------------|--------------------------|----------|-------------|---------------------|
|      |                 |                   |                    | Read Depth             | % Mapped | Allele Call | Read Depth               | % Mapped | Allele Call |                     |
| A10  | Plasmid/gDNA    | *027:03           | TGCCTGGT <u>GG</u> | 3,858                  | 59%      | 2703        | 1,116                    | 17%      | 1801        | 2703/Low Reads      |
| H9   | Plasmid/gDNA    | *027:03           | TGCCTGGT <u>GG</u> | 4,708                  | 48%      | 2703        | <100                     | <10%     | 0902        | 2703/Low Reads      |
| D6   | Plasmid/Plasmid | *027:03           | TGCCTGGT <u>GG</u> | 4,317                  | 62%      | 0902        | 2,546                    | 36%      | 2703        | 0902/2703           |
| A11  | Plasmid/gDNA    | *009:02           | TGCCTGGT <u>GG</u> | 36,456                 | 97%      | 0902        | <100                     | <10%     | 0902        | 0902/0902           |
| H10  | Plasmid/gDNA    | *009:02           | TGCCTGGT <u>GG</u> | 58,254                 | 95%      | 0902        | 706                      | <10%     | 0902        | 0902/0902           |
| D6   | Plasmid/Plasmid | *009:02           | TCGTGGAG <u>CG</u> | 44,567                 | 99%      | 0902        | 243                      | <10%     | 0902        | 0902/0902           |
| H12  | Plasmid/Plasmid | *009:02           | TCGTGGAG <u>CG</u> | 98,744                 | 99%      | 0902        | <100                     | <10%     | 0902        | 0902/0902           |
| A5   | Plasmid/gDNA    | *009:02           | TGCCTGGT <u>GG</u> | 55,874                 | 94%      | 0902        | <100                     | <10%     | 0902        | 0902/0902           |
| B11  | Plasmid/gDNA    | *009:02           | TGCCTGGT <u>GG</u> | 53,389                 | 88%      | 0902        | 1665                     | <10%     | 0902        | 0902/0902           |
| H11  | Plasmid/gDNA    | *009:02           | TGCCTGGT <u>GG</u> | 24,554                 | 92%      | 0902        | <100                     | <10%     | 0902        | 0902/0902           |
| H12  | Plasmid/Plasmid | *009:02           | TGCCTGGT <u>GG</u> | 99,565                 | 99%      | 0902        | <100                     | <10%     | 0902        | 0902/0902           |
| D11  | Plasmid/gDNA    | *009:03           | TCGTGGAG <u>CG</u> | 70,145                 | 94%      | 0903        | 1,090                    | <10%     | 0903        | 0903/0903           |
| A8   | Plasmid/gDNA    | *009:03           | TGCCTGGT <u>GG</u> | 52,986                 | 92%      | 0903        | 865                      | <10%     | 0903        | 0903/0903           |
| A9   | Plasmid/gDNA    | *009:04           | TCGTGGAG <u>CG</u> | <100                   | <10%     | 2601        | <100                     | <10%     | 1801        | low reads/low reads |
| H8   | Plasmid/gDNA    | *009:04           | TGCCTGGT <u>GG</u> | 2,402                  | <10%     | 1801        | <100                     | <10%     | 0901        | low reads/low reads |

| Well | Animal ID  | TruSeq ID          | Control Primary Allele |          |             | Control Secondary Allele |          |             | gDNA Final Call |
|------|------------|--------------------|------------------------|----------|-------------|--------------------------|----------|-------------|-----------------|
|      |            |                    | Read Depth             | % Mapped | Allele Call | Read Depth               | % Mapped | Allele Call |                 |
| A10  | DOW 151    | TCGTGGAG <u>CG</u> | 26,210                 | 93%      | 1801        | 1,056                    | <10%     | 1101        | 1801/1801       |
| H9   | DOW 3020   | TCGTGGAG <u>CG</u> | 35,021                 | 96%      | 2601        | <100                     | <10%     | 3601        | 2601/2601       |
| D6   | N/A        |                    |                        |          |             |                          |          |             |                 |
| A11  | DOW 813    | TCGTGGAG <u>CG</u> | 1,789                  | 23%      | 0902        | <100                     | <10%     | 0201        | 0902/Low Reads  |
| H10  | DOW 3025   | TCGTGGAG <u>CG</u> | 23,500                 | 53%      | 2601        | 18,105                   | 41%      | 1801        | 2601/1801       |
| D6   | N/A        |                    |                        |          |             |                          |          |             |                 |
| H12  | N/A        |                    |                        |          |             |                          |          |             |                 |
| A5   | DOW 1412   | TCGTGGAG <u>CG</u> | 25,003                 | 84%      | 0201        | 3,870                    | 13%      | 0902        | 0201/0201       |
| B11  | DOW 051    | TCGTGGAG <u>CG</u> | 20,749                 | 41%      | 1801        | 3,448                    | <10%     | 0902        | 1801/Low Reads  |
| H11  | DOW 3029   | TCGTGGAG <u>CG</u> | 15,461                 | 95%      | 2601        | 620                      | <10%     | 0902        | 2601/2601       |
| H12  | N/A        |                    |                        |          |             |                          |          |             |                 |
| D11  | SIKMA 9311 | TGCCTGGT <u>GG</u> | 21,358                 | 52%      | 3301        | 15,113                   | 37%      | 1801        | 3301/1801       |
| A8   | 50-P4      | TCGTGGAG <u>CG</u> | 17,614                 | 53%      | 3301        | 11,472                   | 34%      | 1801        | 3301/1801       |
| A9   | SM 513     | TGCCTGGT <u>GG</u> | 139                    | 10%      | 14011       | <100                     | <10%     | 1801        | 14011/Low Reads |
| H8   | DOW 3016   | TCGTGGAG <u>CG</u> | 32,417                 | 83%      | 1801        | 113                      | <10%     | 0201        | 1801/1801       |

**Table S2.** Allelic Frequency of BoLA-DQA1 of total population and within phenotypic cohorts.

| BoLA-DQA Allele | Total No. | Total Freq | BoLA-DQA Allele | Freq. R | Freq. S |
|-----------------|-----------|------------|-----------------|---------|---------|
| *014:01         | 452       | 48.4%      | *003:01         | 90.3%   | 6.5%    |
| *001:01         | 178       | 19.1%      | *013:01         | 85.7%   | 14.3%   |
| *010:02         | 144       | 15.4%      | *014:01         | 72.8%   | 25.0%   |
| *012:04         | 64        | 6.9%       | *001:03         | 65.0%   | 35.0%   |
| *003:01         | 62        | 6.6%       | *010:02         | 62.5%   | 37.5%   |
| *001:03         | 20        | 2.1%       | *001:01         | 56.2%   | 42.7%   |
| *012:01:01      | 7         | 0.7%       | *012:04         | 21.9%   | 78.1%   |
| *003:01         | 7         | 0.7%       | *012:01:01      | 0.0%    | 100.0%  |

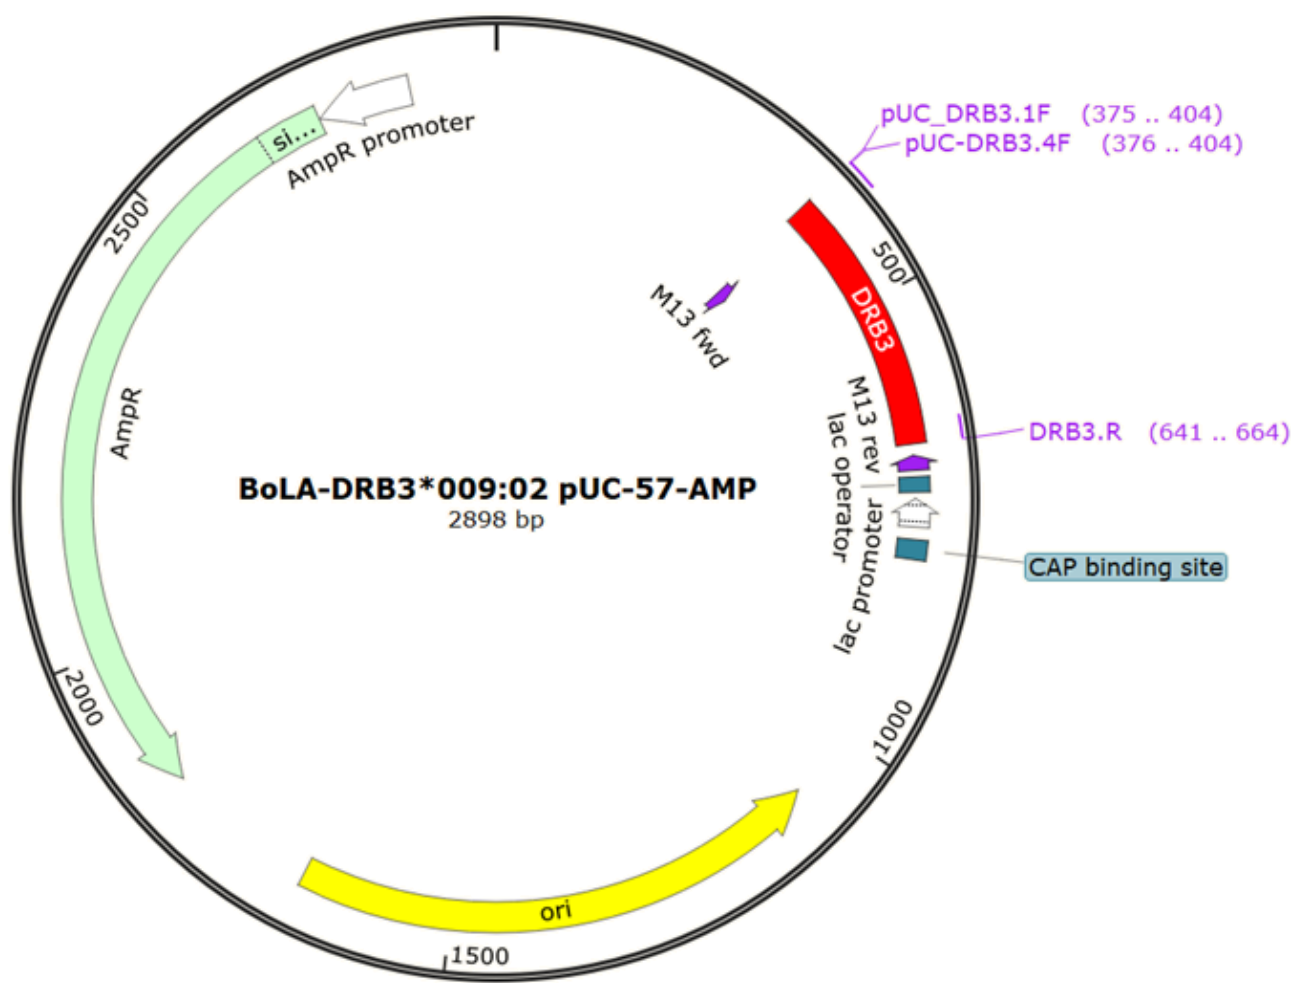

**Figure S2.** Molecular cloning of specific BoLA-DRB3 alleles into puC-57 plasmids for sequencing controls. Barcoded forward primers and universal reverse primers were used to amplify the target insert prior to library preparation and sequencing.

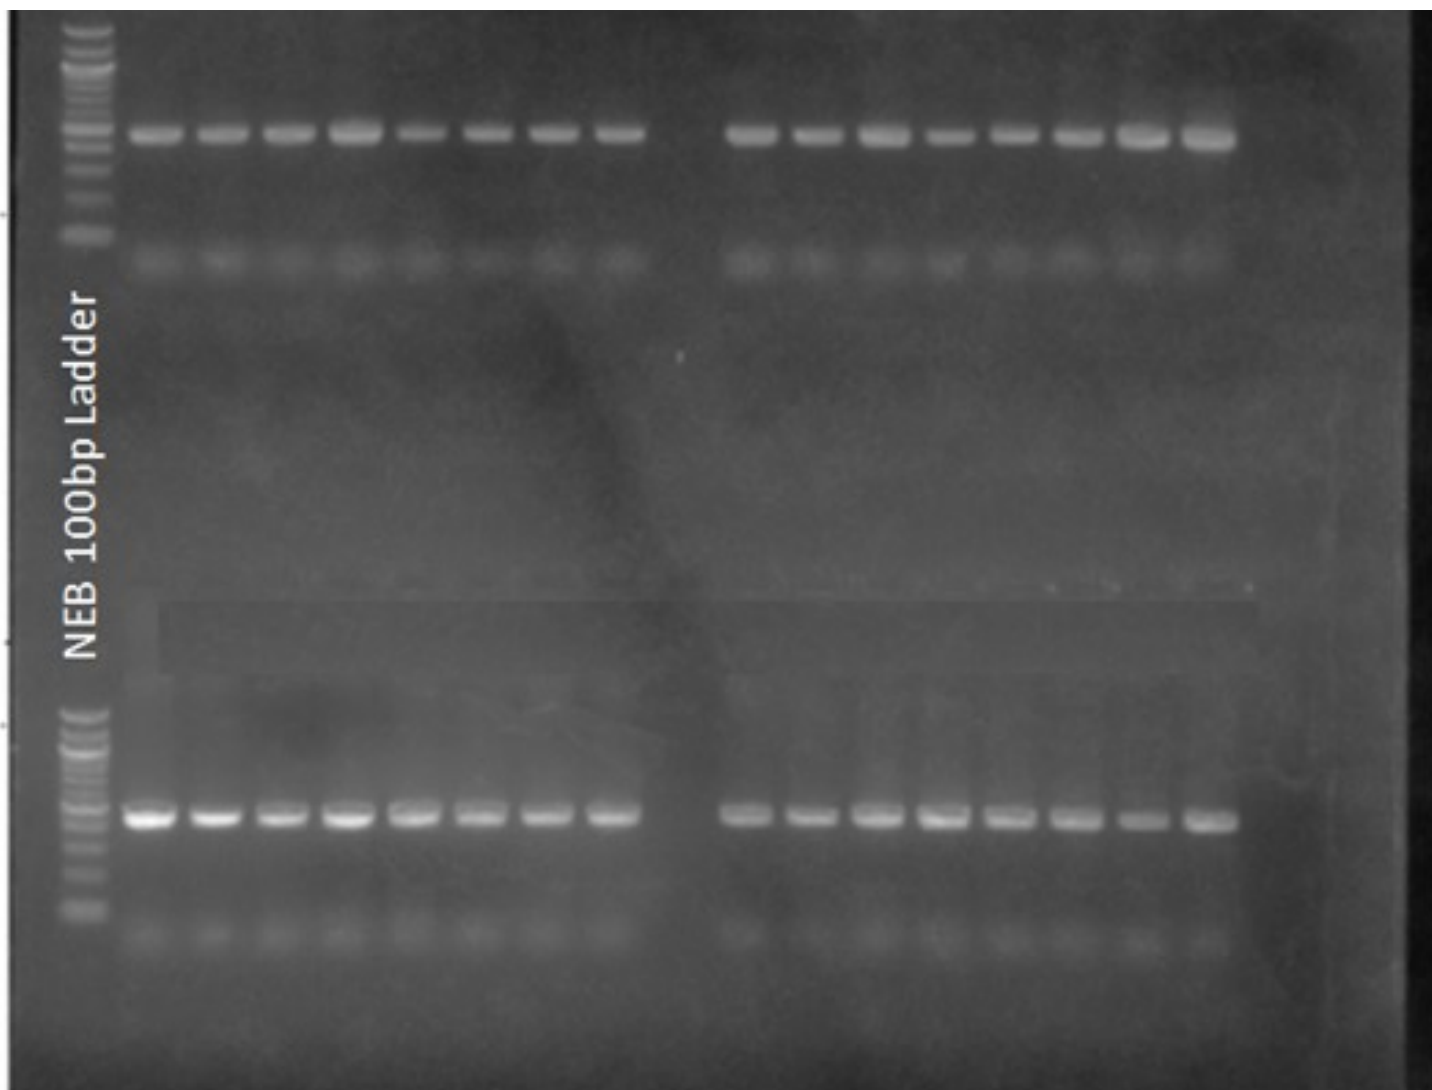

**Figure S3.** Example gel electrophoresis of BoLA-DRB3 barcoded amplicons used to evaluate PCR reactions prior to library preparation.
